## Addendum

## Addendum: What is hemoglobin, albumin, lymphocyte, platelet (HALP) score? A comprehensive literature review of HALP's prognostic ability in different cancer types

**Christian Mark Farag<sup>1</sup>, Ryan Antar<sup>1</sup>, Sinan Akosman<sup>1</sup>, Matthew Ng<sup>2</sup> and Michael J. Whalen<sup>1</sup>**

<sup>1</sup>Department of Urology, George Washington University School of Medicine, Washington, DC 20052, USA

<sup>2</sup>Department of Surgery, George Washington University School of Medicine, Washington, DC 20052, USA

**Published:** August 07, 2023

**Copyright:** © 2023 Farag et al. This is an open access article distributed under the terms of the [Creative Commons Attribution License](#) (CC BY 3.0), which permits unrestricted use, distribution, and reproduction in any medium, provided the original author and source are credited.

**This article has an addendum:** No external funding was obtained for this article.

Original article: Oncotarget. 2023; 14:153–172. <https://doi.org/10.18632/oncotarget.28367>
